# Supplementary material for: Photocatalytic hydrogenation of furan to tetrahydrofuran in alcoholic suspensions of metal-loaded titanium(iv) oxide without addition of hydrogen gas
Source: Royal Society of Chemistry journal article supplement (doi:10.1039/c7cp02891a), 2017-01-01
Supplement: c7cp02891a1.pdf [file c7cp02891a1.pdf]

## Supplementary information

### **Photocatalytic hydrogenation of furan to tetrahydrofuran in alcoholic suspensions of metal-loaded titanium(IV) oxide without addition of hydrogen gas**

Kousuke Nakanishi<sup>a</sup>, Atsuhiro Tanaka<sup>b</sup>, Keiji Hashimoto<sup>b</sup>, Hiroshi Kominami<sup>b\*</sup>

*<sup>a</sup>Interdisciplinary Graduate School of Science and Engineering, Kindai University,  
3-4-1, Kowakae, Higashiosaka, Osaka 577-8502, Japan*

*<sup>b</sup>Department of Applied Chemistry, Faculty of Science and Engineering, Kindai  
University, 3-4-1, Kowakae, Higashiosaka, Osaka 577-8502, Japan.*

#### *Adsorption of furan on TiO<sub>2</sub> or metal-loaded TiO<sub>2</sub>*

TiO<sub>2</sub> (MT-150A) or metal-loaded TiO<sub>2</sub> (200 mg) was suspended in 5 cm<sup>3</sup> of methanol containing furan (40 ± 4 μmol) in a test tube. The test tube was sealed with a rubber septum under argon and the mixture was stirred in a water bath at 293 K for 18 hours in the dark. The amount of furan was determined with an FID-type gas chromatograph (GC-2025, Shimadzu) equipped with a DB-1 column. Chlorobenzene was used as an internal standard sample. Chlorobenzene (7 mm<sup>3</sup>) was added to the reaction solution (3 cm<sup>3</sup>). After the mixture had been stirred for 7 min, furan in the mixture solution was analyzed. The amount of furan was determined from the ratios of the peak areas to the peak area of chlorobenzene.

#### *Catalytic hydrogenation of furan on TiO<sub>2</sub> or metal-loaded TiO<sub>2</sub> under H<sub>2</sub> in the dark*

TiO<sub>2</sub> (MT-150A) or metal-loaded TiO<sub>2</sub> (50 mg) was suspended in 5 cm<sup>3</sup> of methanol in a test tube. The test tube was sealed with a rubber septum under H<sub>2</sub> and injected methanol (500 μmol) containing furan (40 ± 4 μmol). The mixture was stirred in a water bath at 293 K for 5 min in the dark. The amount of THF was determined with an FID-type gas chromatograph (GC-2025, Shimadzu) equipped with a DB-1 column. Chlorobenzene was used as an internal standard sample. Chlorobenzene (7 mm<sup>3</sup>) was added to the reaction solution (3 cm<sup>3</sup>). After the mixture had been stirred for 7 min, furan in the mixture solution was analyzed. The amount of THF was determined from the ratios of the peak areas to the peak area of chlorobenzene.

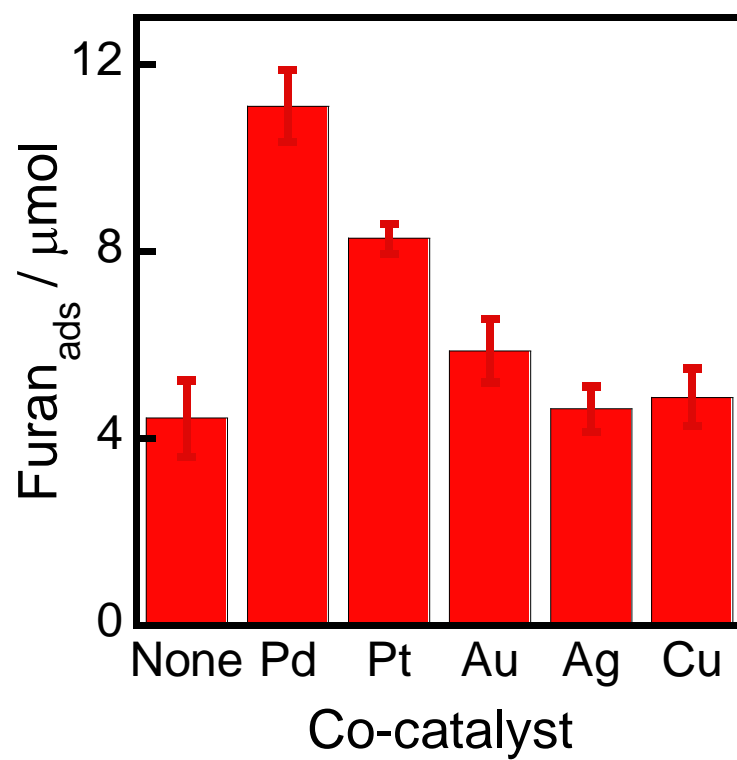

**Figure S1** Effects of different kinds of photocatalysts (each 200 mg) on amount of furan adsorbed in methanolic suspensions for 18 h in the dark.
